# Supplementary material for: Kojic Acid Showed Consistent Inhibitory Activity on Tyrosinase from Mushroom and in Cultured B16F10 Cells Compared with Arbutins
Source: MDPI journal article supplement (doi:10.3390/antiox11030502), 2022-03-04
Supplement: s1 [file s1]

## Supplementary Material

**Table S1.** Effect of compounds on tyrosinase activity of B16F10 cells stimulated by  $\alpha$ -MSH.

| Compounds         | Concentration ( $\mu$ M) |            |            |            |            |
|-------------------|--------------------------|------------|------------|------------|------------|
|                   | 700                      | 350        | 175        | 87.5       | 43.8       |
| Kojic acid        | 71 $\pm$ 7               | 79 $\pm$ 5 | 85 $\pm$ 5 | 88 $\pm$ 3 | 90 $\pm$ 6 |
| $\alpha$ -arbutin | 86 $\pm$ 5               | 93 $\pm$ 5 | 90 $\pm$ 5 | 88 $\pm$ 4 | 91 $\pm$ 4 |
| $\beta$ -arbutin  | 56 $\pm$ 2               | 70 $\pm$ 6 | 76 $\pm$ 2 | 79 $\pm$ 4 | 83 $\pm$ 7 |
| deoxyarbutin      | 3 $\pm$ 1                | 3 $\pm$ 1  | 8 $\pm$ 1  | 17 $\pm$ 2 | 40 $\pm$ 2 |

Note: The tyrosinase activity was calculated as a percentage of the control 2. Tyrosinase activity of blank group (control 1) and control group (control 2) was 56  $\pm$  7% and 100%, respectively.

**Table S2.** Effect of compounds on melanin content of B16F10 cells stimulated by  $\alpha$ -MSH.

| Compounds         | Concentration ( $\mu$ M) |            |            |             |             |
|-------------------|--------------------------|------------|------------|-------------|-------------|
|                   | 700                      | 350        | 175        | 87.5        | 43.8        |
| Kojic acid        | 69 $\pm$ 7               | 79 $\pm$ 9 | 84 $\pm$ 7 | 95 $\pm$ 10 | 94 $\pm$ 5  |
| $\alpha$ -arbutin | 81 $\pm$ 3               | 87 $\pm$ 5 | 92 $\pm$ 3 | 91 $\pm$ 5  | 95 $\pm$ 11 |
| $\beta$ -arbutin  | 59 $\pm$ 8               | 63 $\pm$ 1 | 67 $\pm$ 5 | 75 $\pm$ 1  | 87 $\pm$ 7  |
| deoxyarbutin      | 18 $\pm$ 2               | 23 $\pm$ 2 | 37 $\pm$ 3 | 46 $\pm$ 2  | 67 $\pm$ 7  |

Note: The melanin content was calculated as a percentage of the control 2. Melanin content of control 1 and control 2 was 78  $\pm$  8% and 100%, respectively.

**Table S3.** Effect of compounds on cell viability of B16F10 cells.

| Compounds         | Concentration ( $\mu$ M) |              |              |             |              |
|-------------------|--------------------------|--------------|--------------|-------------|--------------|
|                   | 700                      | 350          | 175          | 87.5        | 43.8         |
| Kojic acid        | 111 $\pm$ 4              | 105 $\pm$ 4  | 105 $\pm$ 4  | 108 $\pm$ 7 | 112 $\pm$ 4  |
| $\alpha$ -arbutin | 145 $\pm$ 14             | 127 $\pm$ 10 | 118 $\pm$ 8  | 113 $\pm$ 7 | 108 $\pm$ 5  |
| $\beta$ -arbutin  | 195 $\pm$ 20             | 166 $\pm$ 13 | 141 $\pm$ 10 | 124 $\pm$ 8 | 115 $\pm$ 5  |
| deoxyarbutin      | 30 $\pm$ 1               | 66 $\pm$ 4   | 68 $\pm$ 6   | 71 $\pm$ 8  | 128 $\pm$ 14 |

Note: The cell viability was calculated as a percentage of the control (no compound treated group).
